# Supplementary material for: Advection-dominated transport dynamics of pili and flagella-mediated motile bacteria in porous media
Source: Royal Society of Chemistry journal article supplement (doi:10.1039/d5sm00071h), 2025-01-01
Supplement: d5sm00071h12.pdf [file d5sm00071h12.pdf]

# OpenFOAM Simulation Workflow

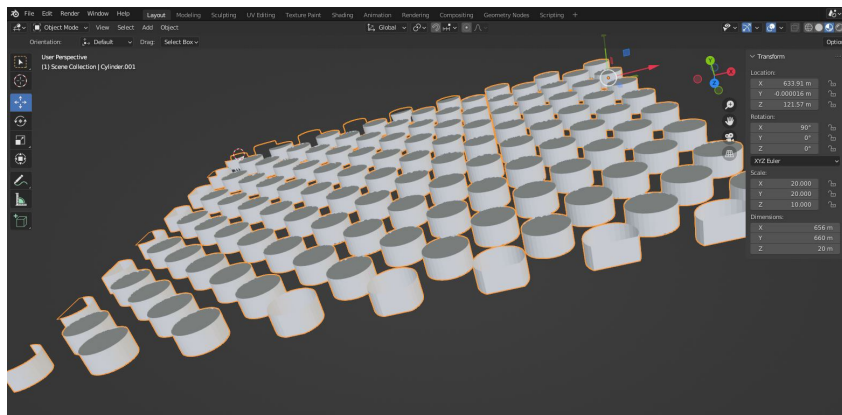

2048x2048 images of our micromodels were used to generate 3D geometries in Blender.

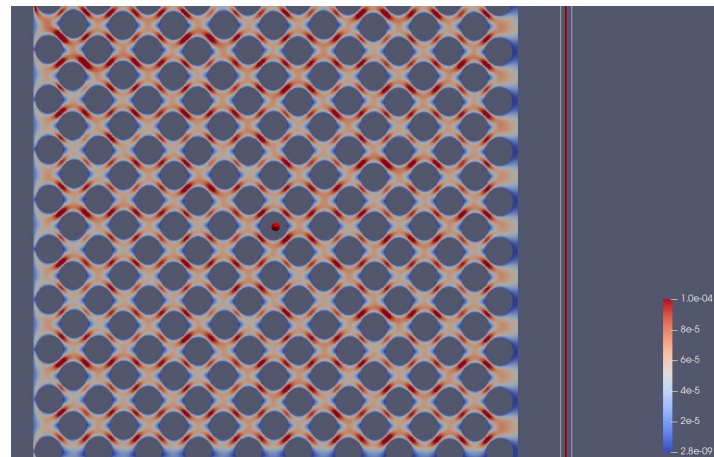

Slice of completed simulation showing full geometry.

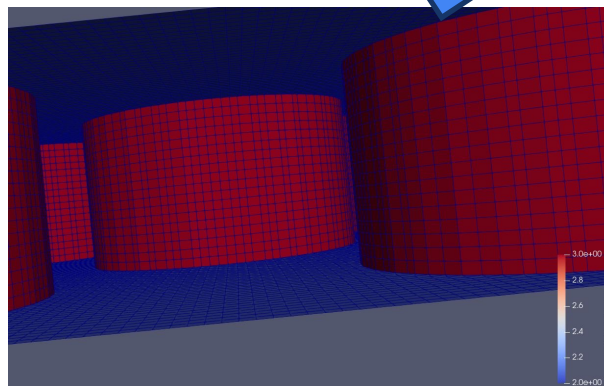

We use snappyHexMesh to make to convert the Blender geometries (saved as .obj files) to OF meshes.
