# Supplementary material for: Advection-dominated transport dynamics of pili and flagella-mediated motile bacteria in porous media
Source: Royal Society of Chemistry journal article supplement (doi:10.1039/d5sm00071h), 2025-01-01
Supplement: d5sm00071h14.xlsx [file d5sm00071h14.xlsx]

## Sheet: Recorded Data
	Time [s]	Index
	0	1
	0.04	2
	0.08	3
	0.12	4
	0.2	5
	0.24	6
	0.32	7
	0.4	8
	0.48	9
	0.56	10
	0.64	11
	0.72	12
	0.8	13
	0.88	14
	0.96	15
	1.04	16
	1.12	17
	1.2	18
	1.28	19
	1.36	20
	1.44	21
	1.52	22
	1.6	23
	1.68	24
	1.76	25
	2	26
	2.08	27
	2.16	28
	2.24	29
	2.32	30
	2.4	31
	2.48	32
	2.56	33
	2.64	34
	2.72	35
	2.8	36
	2.88	37
	2.96	38
	3.04	39
	3.12	40
	3.2	41
	3.28	42
	3.36	43
	3.44	44
	3.52	45
	3.6	46
	3.68	47
	3.76	48
	3.84	49
	3.92	50
	4	51
	4.08	52
	4.16	53
	4.3	54
	4.41	55
	4.45	56
	4.49	57
	4.57	58
	4.61	59
	4.63	60
	4.7	61
	4.78	62
	4.86	63
	4.94	64
	5.02	65
	5.1	66
	5.18	67
	5.26	68
	5.34	69
	5.42	70
	5.5	71
	5.58	72
	5.66	73
	5.74	74
	5.82	75
	5.9	76
	5.94	77
	6.02	78
	6.1	79
	6.18	80
	6.26	81
	6.34	82
	6.42	83
	6.5	84
	6.58	85
	6.66	86
	6.8	87
	6.91	88
	7.02	89
	7.1	90
	7.18	91
	7.26	92
	7.34	93
	7.42	94
	7.5	95
	7.58	96
	7.66	97
	7.74	98
	7.82	99
	7.9	100
	7.98	101
	8.06	102
	8.14	103
	8.22	104
	8.3	105
	8.38	106
	8.46	107
	8.54	108
	8.62	109
	8.7	110
	8.78	111
	8.86	112
	8.94	113
	9.02	114
	9.16	115
	9.27	116
	9.31	117
	9.49	118
	9.57	119
	9.65	120
	9.73	121
	9.81	122
	9.89	123
	9.97	124
	10.05	125
	10.13	126
	10.21	127
	10.29	128
	10.37	129
	10.45	130
	10.53	131
	10.61	132
	10.69	133
	10.77	134
	10.85	135
	10.93	136
	11.01	137
	11.09	138
	11.17	139
	11.25	140
	11.39	141
	11.43	142
	11.61	143
	11.72	144
	11.86	145
	11.97	146
	12.08	147
	12.12	148
	12.16	149
	12.24	150
	12.28	151
	12.32	152
	12.4	153
	12.44	154
	12.48	155
	12.52	156
	12.6	157
	12.64	158
	12.72	159
	12.8	160
	12.88	161
	12.96	162
	13.04	163
	13.12	164
	13.2	165
	13.28	166
	13.36	167
	13.44	168
	13.52	169
	13.6	170
	13.71	171
	13.82	172
	13.93	173
	14.04	174
	14.18	175
	14.29	176
	14.4	177
	14.51	178
	14.55	179
	14.59	180
	14.67	181
	14.71	182
	14.79	183
	14.83	184
	14.87	185
	14.91	186
	14.99	187
	15.03	188
	15.07	189
	15.15	190
	15.19	191
	15.23	192
	15.27	193
	15.35	194
	15.39	195
	15.47	196
	15.51	197
	15.55	198
	15.59	199
	15.67	200
	15.71	201
	15.75	202
	15.86	203
	15.97	204
	16.05	205
	16.23	206
	16.34	207
	16.48	208
	16.59	209
	16.7	210
	16.81	211
	16.89	212
	17	213
	17.04	214
	17.08	215
	17.16	216
	17.2	217
	17.28	218
	17.36	219
	17.44	220
	17.52	221
	17.6	222
	17.68	223
	17.76	224
	17.84	225
	17.92	226
	18	227
	18.08	228
	18.16	229
	18.27	230
	18.41	231
	18.52	232
	18.63	233
	18.77	234
	18.88	235
	18.92	236
	19.1	237
	19.24	238
	19.35	239
	19.39	240
	19.47	241
	19.51	242
	19.55	243
	19.59	244
	19.67	245
	19.71	246
	19.79	247
	19.87	248
	19.95	249
	20.03	250
	20.11	251
	20.19	252
	20.27	253
	20.35	254
	20.43	255
	20.54	256
	20.68	257
	20.72	258
	20.9	259
	21.04	260
	21.15	261
	21.26	262
	21.37	263
	21.51	264
	21.62	265
	21.7	266
	21.74	267
	21.78	268
	21.86	269
	21.9	270
	21.92	271
	21.99	272
	22.07	273
	22.15	274
	22.23	275
	22.31	276
	22.39	277
	22.47	278
	22.55	279
	22.63	280
	22.71	281
	22.85	282
	22.96	283
	23.07	284
	23.18	285
	23.32	286
	23.46	287
	23.54	288
	23.68	289
	23.79	290
	23.9	291
	24.01	292
	24.09	293
	24.17	294
	24.25	295
	24.33	296
	24.41	297
	24.49	298
	24.57	299
	24.65	300
	24.73	301
	24.81	302
	24.89	303
	24.97	304
	25.11	305
	25.19	306
	25.27	307
	25.45	308
	25.59	309
	25.7	310
	25.81	311
	25.95	312
	26.06	313
	26.17	314
	26.28	315
	26.36	316
	26.44	317
	26.52	318
	26.6	319
	26.68	320
	26.76	321
	26.84	322
	26.92	323
	27	324
	27.08	325
	27.16	326
	27.24	327
	27.35	328
	27.49	329
	27.6	330
	27.74	331
	27.85	332
	27.96	333
	28.1	334
	28.14	335
	28.32	336
	28.46	337
	28.57	338
	28.61	339
	28.65	340
	28.73	341
	28.77	342
	28.85	343
	28.93	344
	29.01	345
	29.09	346
	29.17	347
	29.25	348
	29.33	349
	29.41	350
	29.49	351
	29.63	352
	29.74	353
	29.78	354
	29.96	355
	30.07	356
	30.21	357
	30.32	358
	30.43	359
	30.57	360
	30.68	361
	30.79	362
	30.87	363
	30.95	364
	31.03	365
	31.11	366
	31.19	367
	31.27	368
	31.35	369
	31.43	370
	31.51	371
	31.59	372
	31.67	373
	31.75	374
	31.86	375
	31.94	376
	32.12	377
	32.23	378
	32.34	379
	32.42	380
	32.6	381
	32.71	382
	32.79	383
	32.97	384
	33.08	385
	33.16	386
	33.24	387
	33.32	388
	33.4	389
	33.48	390
	33.56	391
	33.64	392
	33.72	393
	33.8	394
	33.88	395
	33.96	396
	34.04	397
	34.18	398
	34.22	399
	34.4	400
	34.54	401
	34.65	402
	34.76	403
	34.87	404
	35.01	405
	35.12	406
	35.23	407
	35.37	408
	35.45	409
	35.47	410
	35.54	411
	35.62	412
	35.7	413
	35.78	414
	35.86	415
	35.94	416
	36.02	417
	36.1	418
	36.18	419
	36.26	420
	36.34	421
	36.42	422
	36.56	423
	36.67	424
	36.81	425
	36.92	426
	36.96	427
	37.14	428
	37.28	429
	37.39	430
	37.5	431
	37.61	432
	37.69	433
	37.77	434
	37.85	435
	37.93	436
	38.01	437
	38.09	438
	38.17	439
	38.25	440
	38.33	441
	38.41	442
	38.49	443
	38.57	444
	38.71	445
	38.82	446
	38.93	447
	39.04	448
	39.18	449
	39.29	450
	39.4	451
	39.54	452
	39.65	453
	39.76	454
	39.87	455
	39.98	456
	40.06	457
	40.08	458
	40.15	459
	40.23	460
	40.31	461
	40.39	462
	40.47	463
	40.55	464
	40.63	465
	40.71	466
	40.79	467
	40.87	468
	40.98	469
	41.09	470
	41.2	471
	41.31	472
	41.42	473
	41.5	474
	41.68	475
	41.79	476
	41.93	477
	42.04	478
	42.15	479
	42.26	480
	42.34	481
	42.42	482
	42.5	483
	42.58	484
	42.66	485
	42.74	486
	42.82	487
	42.9	488
	42.98	489
	43.06	490
	43.14	491
	43.22	492
	43.36	493
	43.47	494
	43.58	495
	43.69	496
	43.83	497
	43.94	498
	44.05	499
	44.19	500
	44.3	501
	44.41	502
	44.55	503
	44.66	504
	44.7	505
	44.88	506
	45.02	507
	45.13	508
	45.24	509
	45.35	510
	45.43	511
	45.61	512
	45.72	513
	45.86	514
	45.97	515
	46.08	516
	46.19	517
	46.33	518
	46.44	519
	46.55	520
	46.69	521
	46.8	522
	46.91	523
	47.02	524
	47.16	525
	47.27	526
	47.38	527
	47.49	528
	47.57	529
	47.75	530
	47.86	531
	47.97	532
	48.11	533
	48.15	534
	48.33	535
	48.41	536
	48.59	537
	48.73	538
	48.81	539
	48.99	540
	49.1	541
	49.24	542
	49.35	543
	49.46	544
	49.6	545
	49.71	546
	49.82	547
	49.93	548
	50.01	549
	50.19	550
	50.3	551
	50.44	552
	50.55	553
	50.66	554
	50.77	555
	50.85	556
	51.03	557
	51.14	558
	51.25	559
	51.39	560
	51.5	561
	51.54	562
	51.72	563
	51.8	564
	51.98	565
	52.09	566
	52.23	567
	52.27	568
	52.45	569
	52.59	570
	52.7	571
	52.81	572
	52.92	573
	53.06	574
	53.17	575
	53.28	576
	53.39	577
	53.53	578
	53.64	579
	53.75	580
	53.86	581
	53.94	582
	53.98	583
	54.06	584
	54.14	585
	54.22	586
	54.3	587
	54.38	588
	54.46	589
	54.54	590
	54.62	591
	54.7	592
	54.78	593
	54.86	594
	54.94	595
	55.02	596
	55.1	597
	55.18	598
	55.26	599
	55.34	600
	55.42	601
	55.5	602
	55.58	603
	55.66	604
	55.74	605
	55.82	606
	55.9	607
	55.98	608
	56.06	609
	56.14	610
	56.22	611
	56.3	612
	56.38	613
	56.46	614
	56.57	615
	56.68	616
	56.79	617
	56.93	618
	57.04	619
	57.15	620
	57.23	621
	57.41	622
	57.52	623
	57.63	624
	57.77	625
	57.81	626
	57.99	627
	58.1	628
	58.24	629
	58.35	630
	58.46	631
	58.6	632
	58.64	633
	58.82	634
	58.96	635
	59.07	636
	59.18	637
	59.29	638
	59.43	639
	59.57	640
	59.68	641
	59.79	642
	59.9	643
	60.04	644
	60.18	645
	60.29	646
	60.4	647
	60.51	648
	60.65	649
	60.76	650
	60.87	651
	61.01	652
	61.12	653
	61.23	654
	61.34	655
	61.48	656
	61.59	657
	61.7	658
	61.84	659
	61.95	660
	62.06	661
	62.17	662
	62.28	663
	62.42	664
	62.53	665
	62.64	666
	62.78	667
	62.89	668
	63	669
	63.11	670
	63.19	671
	63.37	672
	63.48	673
	63.62	674
	63.73	675
	63.84	676
	63.95	677
	64.03	678
	64.21	679
	64.32	680
	64.46	681
	64.57	682
	64.71	683
	64.79	684
	64.87	685
	65.05	686
	65.16	687
	65.3	688
	65.41	689
	65.52	690
	65.63	691
	65.77	692
	65.81	693
	65.99	694
	66.13	695
	66.24	696
	66.35	697
	66.46	698
	66.6	699
	66.71	700
	66.82	701
	66.93	702
	67.01	703
	67.19	704
	67.3	705
	67.41	706
	67.55	707
	67.66	708
	67.77	709
	67.91	710
	68.02	711
	68.13	712
	68.24	713
	68.38	714
	68.49	715
	68.6	716
	68.71	717
	68.85	718
	68.96	719
	69.14	720
	69.25	721
	69.36	722
	69.5	723
	69.61	724
	69.72	725
	69.83	726
	69.97	727
	70.08	728
	70.19	729
	70.33	730
	70.44	731
	70.55	732
	70.66	733
	70.8	734
	70.91	735
	71.02	736
	71.13	737
	71.27	738
	71.38	739
	71.49	740
	71.63	741
	71.74	742
	71.85	743
	71.96	744
	72.04	745
	72.22	746
	72.33	747
	72.47	748
	72.58	749
	72.69	750
	72.8	751
	72.94	752
	73.05	753
	73.16	754
	73.3	755
	73.41	756
	73.52	757
	73.63	758
	73.77	759
	73.88	760
	73.99	761
	74.1	762
	74.24	763
	74.35	764
	74.46	765
	74.57	766
	74.71	767
	74.82	768
	74.93	769
	75.07	770
	75.18	771
	75.29	772
	75.4	773
	75.54	774
	75.65	775
	75.76	776
	75.9	777
	76.01	778
	76.12	779
	76.23	780
	76.34	781
	76.42	782
	76.6	783
	76.74	784
	76.85	785
	76.96	786
	77.07	787
	77.21	788
	77.32	789
	77.43	790
	77.57	791
	77.68	792
	77.79	793
	77.9	794
	78.01	795
	78.15	796
	78.19	797
	78.23	798
	78.31	799
	78.35	800
	78.43	801
	78.51	802
	78.59	803
	78.67	804
	78.75	805
	78.83	806
	78.91	807
	78.99	808
	79.07	809
	79.15	810
	79.23	811
	79.31	812
	79.39	813
	79.47	814
	79.55	815
	79.63	816
	79.71	817
	79.79	818
	79.87	819
	79.95	820
	80.03	821
	80.11	822
	80.19	823
	80.27	824
	80.35	825
	80.43	826
	80.51	827
	80.59	828
	80.7	829
	80.81	830
	80.92	831
	81.06	832
	81.17	833
	81.28	834
	81.42	835
	81.46	836
	81.64	837
	81.75	838
	81.86	839
	82	840
	82.11	841
	82.25	842
	82.36	843
	82.47	844
	82.58	845
	82.72	846
	82.83	847
	82.94	848
	83.05	849
	83.19	850
	83.23	851
	83.41	852
	83.55	853
	83.66	854
	83.77	855
	83.88	856
	84.02	857
	84.13	858
	84.24	859
	84.38	860
	84.49	861
	84.6	862
	84.71	863
	84.82	864
	84.96	865
	85.07	866
	85.18	867
	85.26	868
	85.44	869
	85.55	870
	85.63	871
	85.81	872
	85.92	873
	86.03	874
	86.17	875
	86.28	876
	86.39	877
	86.53	878
	86.64	879
	86.75	880
	86.86	881
	87	882
	87.11	883
	87.22	884
	87.33	885
	87.41	886
	87.59	887
	87.7	888
	87.84	889
	87.95	890
	87.99	891
	88.17	892
	88.31	893
	88.42	894
	88.46	895
	88.64	896
	88.72	897
	88.9	898
	89.04	899
	89.15	900
	89.26	901
	89.37	902
	89.48	903
	89.62	904
	89.73	905
	89.84	906
	89.98	907
	90.09	908
	90.2	909
	90.31	910
	90.45	911
	90.56	912
	90.67	913
	90.78	914
	90.92	915
	91.03	916
	91.14	917
	91.18	918
	91.26	919
	91.3	920
	91.34	921
	91.38	922
	91.49	923
	91.6	924
	91.71	925
	91.85	926
	91.96	927
	92.1	928
	92.18	929
	92.32	930
	92.43	931
	92.54	932
	92.68	933
	92.79	934
	92.9	935
	93.01	936
	93.12	937
	93.2	938
	93.28	939
	93.36	940
	93.44	941
	93.52	942
	93.6	943
	93.71	944
	93.82	945
	93.93	946
	94.04	947
	94.18	948
	94.29	949
	94.4	950
	94.51	951
	94.59	952
	94.77	953
	94.91	954
	95.02	955
	95.13	956
	95.24	957
	95.38	958
	95.4	959
	95.47	960
	95.55	961
	95.63	962
	95.71	963
	95.79	964
	95.87	965
	95.95	966
	96.06	967
	96.17	968
	96.28	969
	96.42	970
	96.46	971
	96.64	972
	96.78	973
	96.86	974
	97	975
	97.11	976
	97.25	977
	97.36	978
	97.47	979
	97.58	980
	97.72	981
	97.83	982
	97.94	983
	98.05	984
	98.19	985
	98.3	986
	98.41	987
	98.49	988
	98.67	989
	98.81	990
	98.89	991
	99.03	992
	99.14	993
	99.25	994
	99.36	995
	99.44	996
	99.62	997
	99.7	998
	99.78	999
	99.86	1000
	99.94	1001
	100.02	1002
	100.1	1003
	100.18	1004
	100.26	1005
	100.37	1006
	100.48	1007
	100.59	1008
	100.73	1009
	100.84	1010
	100.95	1011
	101.06	1012
	101.2	1013
	101.31	1014
	101.42	1015
	101.56	1016
	101.67	1017
	101.81	1018
	101.85	1019
	101.93	1020
	102.01	1021
	102.09	1022
	102.17	1023
	102.25	1024
	102.33	1025
	102.41	1026
	102.49	1027
	102.6	1028
	102.71	1029
	102.82	1030
	102.96	1031
	103.07	1032
	103.21	1033
	103.32	1034
	103.43	1035
	103.54	1036
	103.68	1037
	103.79	1038
	103.9	1039
	104.01	1040
	104.12	1041
	104.2	1042
	104.28	1043
	104.36	1044
	104.44	1045
	104.52	1046
	104.6	1047
	104.68	1048
	104.76	1049
	104.84	1050
	104.92	1051
	105.06	1052
	105.2	1053
	105.31	1054
	105.42	1055
	105.53	1056
	105.67	1057
	105.78	1058
	105.89	1059
	106	1060
	106.08	1061
	106.26	1062
	106.37	1063
	106.45	1064
	106.53	1065
	106.61	1066
	106.69	1067
	106.77	1068
	106.85	1069
	106.93	1070
	107.01	1071
	107.09	1072
	107.2	1073
	107.31	1074
	107.45	1075
	107.56	1076
	107.6	1077
	107.78	1078
	107.89	1079
	107.97	1080
	108.15	1081
	108.26	1082
	108.4	1083
	108.51	1084
	108.65	1085
	108.67	1086
	108.74	1087
	108.82	1088
	108.9	1089
	108.98	1090
	109.06	1091
	109.14	1092
	109.22	1093
	109.3	1094
	109.38	1095
	109.46	1096
	109.6	1097
	109.71	1098
	109.82	1099
	109.93	1100
	110.07	1101
	110.18	1102
	110.29	1103
	110.4	1104
	110.54	1105
	110.65	1106
	110.76	1107
	110.87	1108
	110.91	1109
	110.99	1110
	111.07	1111
	111.15	1112
	111.23	1113
	111.31	1114
	111.39	1115
	111.47	1116
	111.58	1117
	111.69	1118
	111.8	1119
	111.94	1120
	112.05	1121
	112.16	1122
	112.27	1123
	112.41	1124
	112.52	1125
	112.63	1126
	112.71	1127
	112.89	1128
	113	1129
	113.14	1130
	113.18	1131
	113.22	1132
	113.26	1133
	113.34	1134
	113.42	1135
	113.5	1136
	113.58	1137
	113.66	1138
	113.74	1139
	113.82	1140
	113.93	1141
	114.04	1142
	114.18	1143
	114.29	1144
	114.4	1145
	114.51	1146
	114.59	1147
	114.77	1148
	114.88	1149
	115.02	1150
	115.13	1151
	115.24	1152
	115.35	1153
	115.43	1154
	115.51	1155
	115.59	1156
	115.67	1157
	115.75	1158
	115.83	1159
	115.91	1160
	115.99	1161
	116.07	1162
	116.18	1163
	116.29	1164
	116.4	1165
	116.54	1166
	116.65	1167
	116.76	1168
	116.9	1169
	117.01	1170
	117.12	1171
	117.23	1172
	117.37	1173
	117.48	1174
	117.62	1175
	117.64	1176
	117.71	1177
	117.79	1178
	117.87	1179
	117.95	1180
	118.03	1181
	118.11	1182
	118.19	1183
	118.3	1184
	118.41	1185
	118.52	1186
	118.66	1187
	118.77	1188
	118.81	1189
	118.99	1190
	119.13	1191
	119.24	1192
	119.35	1193
	119.46	1194
	119.6	1195
	119.71	1196
	119.82	1197
	119.84	1198
	119.91	1199
	119.99	1200
	120.07	1201
	120.15	1202
	120.23	1203
	120.31	1204
	120.39	1205
	120.47	1206
	120.55	1207
	120.66	1208
	120.8	1209
	120.91	1210
	121.02	1211
	121.16	1212
	121.27	1213
	121.38	1214
	121.49	1215
	121.6	1216
	121.74	1217
	121.85	1218
	121.96	1219
	122.1	1220
	122.14	1221
	122.18	1222
	122.22	1223
	122.3	1224
	122.38	1225
	122.46	1226
	122.54	1227
	122.62	1228
	122.7	1229
	122.78	1230
	122.89	1231
	123	1232
	123.08	1233
	123.26	1234
	123.37	1235
	123.51	1236
	123.62	1237
	123.73	1238
	123.84	1239
	123.98	1240
	124.09	1241
	124.2	1242
	124.31	1243
	124.39	1244
	124.47	1245
	124.55	1246
	124.63	1247
	124.71	1248
	124.79	1249
	124.87	1250
	124.95	1251
	125.03	1252
	125.14	1253
	125.25	1254
	125.39	1255
	125.5	1256
	125.61	1257
	125.72	1258
	125.8	1259
	125.98	1260
	126.09	1261
	126.23	1262
	126.34	1263
	126.45	1264
	126.56	1265
	126.64	1266
	126.72	1267
	126.8	1268
	126.88	1269
	126.96	1270
	127.04	1271
	127.12	1272
	127.2	1273
	127.28	1274
	127.39	1275
	127.53	1276
	127.64	1277
	127.72	1278
	127.9	1279
	128.01	1280
	128.12	1281
	128.26	1282
	128.37	1283
	128.48	1284
	128.56	1285
	128.74	1286
	128.85	1287
	128.93	1288
	129.01	1289
	129.09	1290
	129.17	1291
	129.25	1292
	129.33	1293
	129.41	1294
	129.52	1295
	129.63	1296
	129.74	1297
	129.88	1298
	129.99	1299
	130.13	1300
	130.24	1301
	130.28	1302
	130.46	1303
	130.6	1304
	130.71	1305
	130.82	1306
	130.93	1307
	131.07	1308
	131.11	1309
	131.15	1310
	131.23	1311
	131.27	1312
	131.29	1313
	131.36	1314
	131.44	1315
	131.52	1316
	131.6	1317
	131.68	1318
	131.76	1319
	131.87	1320
	132.01	1321
	132.12	1322
	132.23	1323
	132.37	1324
	132.48	1325
	132.59	1326
	132.7	1327
	132.81	1328
	132.95	1329
	133.09	1330
	133.17	1331
	133.31	1332
	133.35	1333
	133.39	1334
	133.43	1335
	133.51	1336
	133.59	1337
	133.67	1338
	133.75	1339
	133.83	1340
	133.91	1341
	133.99	1342
	134.1	1343
	134.24	1344
	134.35	1345
	134.46	1346
	134.57	1347
	134.71	1348
	134.82	1349
	134.93	1350
	135.04	1351
	135.12	1352
	135.3	1353
	135.41	1354
	135.52	1355
	135.6	1356
	135.68	1357
	135.76	1358
	135.84	1359
	135.92	1360
	136	1361
	136.08	1362
	136.16	1363
	136.24	1364
	136.35	1365
	136.46	1366
	136.6	1367
	136.71	1368
	136.82	1369
	136.96	1370
	137.07	1371
	137.18	1372
	137.29	1373
	137.43	1374
	137.54	1375
	137.68	1376
	137.79	1377
	137.83	1378
	137.87	1379
	137.91	1380
	137.99	1381
	138.07	1382
	138.15	1383
	138.23	1384
	138.31	1385
	138.39	1386
	138.47	1387
	138.58	1388
	138.69	1389
	138.83	1390
	138.94	1391
	139.08	1392
	139.19	1393
	139.3	1394
	139.41	1395
	139.52	1396
	139.66	1397
	139.77	1398
	139.88	1399
	139.99	1400
	140.07	1401
	140.15	1402
	140.23	1403
	140.31	1404
	140.39	1405
	140.47	1406
	140.55	1407
	140.63	1408
	140.71	1409
	140.82	1410
	140.93	1411
	141.04	1412
	141.18	1413
	141.29	1414
	141.4	1415
	141.51	1416
	141.59	1417
	141.77	1418
	141.91	1419
	142.02	1420
	142.13	1421
	142.24	1422
	142.32	1423
	142.4	1424
	142.48	1425
	142.56	1426
	142.64	1427
	142.72	1428
	142.8	1429
	142.88	1430
	142.96	1431
	143.07	1432
	143.15	1433
	143.33	1434
	143.44	1435
	143.55	1436
	143.69	1437
	143.73	1438
	143.91	1439
	144.05	1440
	144.16	1441
	144.18	1442
	144.41	1443
	144.52	1444
	144.56	1445
	144.64	1446
	144.72	1447
	144.8	1448
	144.88	1449
	144.96	1450
	145.04	1451
	145.12	1452
	145.2	1453
	145.31	1454
	145.45	1455
	145.56	1456
	145.67	1457
	145.78	1458
	145.92	1459
	146.03	1460
	146.14	1461
	146.25	1462
	146.39	1463
	146.5	1464
	146.61	1465
	146.75	1466
	146.79	1467
	146.83	1468
	146.87	1469
	146.95	1470
	147.03	1471
	147.11	1472
	147.19	1473
	147.27	1474
	147.35	1475
	147.43	1476
	147.54	1477
	147.65	1478
	147.79	1479
	147.9	1480
	148.01	1481
	148.15	1482
	148.26	1483
	148.37	1484
	148.51	1485
	148.62	1486
	148.73	1487
	148.84	1488
	148.98	1489
	149.02	1490
	149.06	1491
	149.14	1492
	149.18	1493
	149.26	1494
	149.3	1495
	149.34	1496
	149.38	1497
	149.46	1498
	149.5	1499
	149.58	1500
	149.6	1501
	149.77	1502
	149.88	1503
	149.96	1504
	150.14	1505
	150.28	1506
	150.39	1507
	150.5	1508
	150.61	1509
	150.72	1510
	150.86	1511
	150.97	1512
	151.08	1513
	151.19	1514
	151.27	1515
	151.35	1516
	151.43	1517
	151.51	1518
	151.59	1519
	151.67	1520
	151.75	1521
	151.83	1522
	151.91	1523
	152.02	1524
	152.13	1525
	152.21	1526
	152.39	1527
	152.5	1528
	152.61	1529
	152.75	1530
	152.86	1531
	152.97	1532
	153.11	1533
	153.19	1534
	153.37	1535
	153.48	1536
	153.52	1537
	153.6	1538
	153.68	1539
	153.76	1540
	153.84	1541
	153.92	1542
	154	1543
	154.08	1544
	154.16	1545
	154.27	1546
	154.38	1547
	154.46	1548
	154.67	1549
	154.78	1550
	154.89	1551
	155	1552
	155.11	1553
	155.25	1554
	155.36	1555
	155.47	1556
	155.61	1557
	155.72	1558
	155.76	1559
	155.84	1560
	155.92	1561
	156	1562
	156.08	1563
	156.16	1564
	156.24	1565
	156.32	1566
	156.4	1567
	156.51	1568
	156.65	1569
	156.69	1570
	156.87	1571
	157.01	1572
	157.09	1573
	157.23	1574
	157.34	1575
	157.45	1576
	157.59	1577
	157.63	1578
	157.84	1579
	157.95	1580
	157.99	1581
	158.03	1582
	158.11	1583
	158.19	1584
	158.27	1585
	158.35	1586
	158.43	1587
	158.51	1588
	158.59	1589
	158.67	1590
	158.75	1591
	158.89	1592
	159	1593
	159.11	1594
	159.22	1595
	159.36	1596
	159.47	1597
	159.58	1598
	159.72	1599
	159.83	1600
	159.94	1601
	160.05	1602
	160.19	1603
	160.23	1604
	160.27	1605
	160.35	1606
	160.39	1607
	160.47	1608
	160.55	1609
	160.63	1610
	160.71	1611
	160.79	1612
	160.87	1613
	160.98	1614
	161.09	1615
	161.23	1616
	161.34	1617
	161.45	1618
	161.56	1619
	161.64	1620
	161.82	1621
	161.93	1622
	162.07	1623
	162.18	1624
	162.29	1625
	162.43	1626
	162.47	1627
	162.51	1628
	162.59	1629
	162.63	1630
	162.71	1631
	162.75	1632
	162.79	1633
	162.83	1634
	162.91	1635
	162.95	1636
	162.97	1637
	163.1	1638
	163.21	1639
	163.32	1640
	163.46	1641
	163.57	1642
	163.68	1643
	163.82	1644
	163.93	1645
	164.04	1646
	164.15	1647
	164.29	1648
	164.4	1649
	164.51	1650
	164.62	1651
	164.7	1652
	164.78	1653
	164.86	1654
	164.94	1655
	165.02	1656
	165.1	1657
	165.18	1658
	165.26	1659
	165.34	1660
	165.45	1661
	165.53	1662
	165.71	1663
	165.82	1664
	165.96	1665
	166.07	1666
	166.18	1667
	166.32	1668
	166.43	1669
	166.54	1670
	166.65	1671
	166.76	1672
	166.9	1673
	166.94	1674
	167.02	1675
	167.1	1676
	167.18	1677
	167.26	1678
	167.34	1679
	167.42	1680
	167.5	1681
	167.58	1682
	167.69	1683
	167.83	1684
	167.94	1685
	168.05	1686
	168.19	1687
	168.3	1688
	168.41	1689
	168.52	1690
	168.66	1691
	168.77	1692
	168.88	1693
	168.99	1694
	169.07	1695
	169.18	1696
	169.22	1697
	169.26	1698
	169.3	1699
	169.38	1700
	169.46	1701
	169.54	1702
	169.62	1703
	169.7	1704
	169.78	1705
	169.86	1706
	169.94	1707
	170.08	1708
	170.19	1709
	170.3	1710
	170.41	1711
	170.49	1712
	170.67	1713
	170.78	1714
	170.92	1715
	171.03	1716
	171.14	1717
	171.25	1718
	171.33	1719
	171.44	1720
	171.52	1721
	171.6	1722
	171.68	1723
	171.76	1724
	171.84	1725
	171.92	1726
	172	1727
	172.08	1728
	172.19	1729
	172.33	1730
	172.44	1731
	172.55	1732
	172.66	1733
	172.74	1734
	172.98	1735
	173.09	1736
	173.2	1737
	173.34	1738
	173.45	1739
	173.49	1740
	173.7	1741
	173.81	1742
	173.92	1743
	174.06	1744
	174.1	1745
	174.14	1746
	174.25	1747
	174.39	1748
	174.5	1749
	174.61	1750
	174.72	1751
	174.8	1752
	174.98	1753
	175.09	1754
	175.17	1755
	175.35	1756
	175.46	1757
	175.57	1758
	175.71	1759
	175.82	1760
	175.93	1761
	176.04	1762
	176.18	1763
	176.26	1764
	176.28	1765
	176.35	1766
	176.46	1767
	176.6	1768
	176.71	1769
	176.82	1770
	176.96	1771
	177.07	1772
	177.18	1773
	177.29	1774
	177.43	1775
	177.54	1776
	177.65	1777
	177.76	1778
	177.9	1779
	178.01	1780
	178.12	1781
	178.26	1782
	178.37	1783
	178.48	1784
	178.52	1785
	178.63	1786
	178.74	1787
	178.88	1788
	178.99	1789
	179.1	1790
	179.24	1791
	179.35	1792
	179.46	1793
	179.6	1794
	179.71	1795
	179.82	1796
	179.93	1797
	180.07	1798
	180.18	1799
	180.29	1800
	180.4	1801
	180.54	1802
	180.58	1803
	180.62	1804
	180.7	1805
	180.74	1806
	180.82	1807
	180.93	1808
	181.07	1809
	181.18	1810
	181.29	1811
	181.43	1812
	181.54	1813
	181.65	1814
	181.76	1815
	181.84	1816
	182.02	1817
	182.16	1818
	182.27	1819
	182.38	1820
	182.52	1821
	182.6	1822
	182.74	1823
	182.78	1824
	182.82	1825
	182.9	1826
	182.98	1827
	183.06	1828
	183.14	1829
	183.28	1830
	183.39	1831
	183.5	1832
	183.61	1833
	183.69	1834
	183.87	1835
	183.98	1836
	184.12	1837
	184.23	1838
	184.34	1839
	184.45	1840
	184.53	1841
	184.71	1842
	184.82	1843
	184.93	1844
	185.01	1845
	185.09	1846
	185.17	1847
	185.25	1848
	185.33	1849
	185.51	1850
	185.62	1851
	185.76	1852
	185.87	1853
	185.98	1854
	186.09	1855
	186.23	1856
	186.27	1857
	186.45	1858
	186.59	1859
	186.7	1860
	186.81	1861
	186.92	1862
	187.06	1863
	187.17	1864
	187.28	1865
	187.36	1866
	187.4	1867
	187.44	1868
	187.48	1869
	187.56	1870
	187.64	1871
	187.72	1872
	187.8	1873
	187.88	1874
	187.96	1875
	188.04	1876
	188.12	1877
	188.2	1878
	188.28	1879
	188.36	1880
	188.44	1881
	188.52	1882
	188.6	1883
	188.68	1884
	188.76	1885
	188.84	1886
	188.92	1887
	189	1888
	189.08	1889
	189.16	1890
	189.24	1891
	189.32	1892
	189.4	1893
	189.48	1894
	189.56	1895
	189.64	1896
	189.72	1897
	189.8	1898
	189.88	1899
	189.99	1900
	190.1	1901
	190.21	1902
	190.35	1903
	190.46	1904
	190.57	1905
	190.68	1906
	190.86	1907
	190.97	1908
	191.08	1909
	191.19	1910
	191.33	1911
	191.44	1912
	191.55	1913
	191.66	1914
	191.8	1915
	191.84	1916
	192.02	1917
	192.13	1918
	192.27	1919
	192.38	1920
	192.56	1921
	192.67	1922
	192.78	1923
	192.92	1924
	193.03	1925
	193.14	1926
	193.22	1927
	193.3	1928
	193.41	1929
	193.52	1930
	193.66	1931
	193.77	1932
	193.91	1933
	194.02	1934
	194.16	1935
	194.27	1936
	194.38	1937
	194.52	1938
	194.63	1939
	194.77	1940
	194.88	1941
	194.99	1942
	195.1	1943
	195.24	1944
	195.38	1945
	195.49	1946
	195.63	1947
	195.74	1948
	195.85	1949
	195.96	1950
	196.1	1951
	196.21	1952
	196.32	1953
	196.43	1954
	196.57	1955
	196.68	1956
	196.79	1957
	196.93	1958
	197.04	1959
	197.15	1960
	197.29	1961
	197.37	1962
	197.51	1963
	197.62	1964
	197.73	1965
	197.81	1966
	197.99	1967
	198.1	1968
	198.21	1969
	198.35	1970
	198.49	1971
	198.57	1972
	198.71	1973
	198.82	1974
	198.93	1975
	199.04	1976
	199.18	1977
	199.29	1978
	199.4	1979
	199.51	1980
	199.59	1981
	199.77	1982
	199.88	1983
	199.96	1984
	200.14	1985
	200.25	1986
	200.39	1987
	200.43	1988
	200.61	1989
	200.72	1990
	200.8	1991
	200.98	1992
	201.09	1993
	201.2	1994
	201.34	1995
	201.45	1996
	201.56	1997
	201.7	1998
	201.81	1999
[truncated: 1,216 more rows]
