# Supplementary material for: Advection-dominated transport dynamics of pili and flagella-mediated motile bacteria in porous media
Source: Royal Society of Chemistry journal article supplement (doi:10.1039/d5sm00071h), 2025-01-01
Supplement: d5sm00071h16.pdf [file d5sm00071h16.pdf]

The supplementary data folder contains time data and particle tracking data for *Paenibacillus* in the low porosity geometry at 1 uL/h. This data can be used to calculate the statistics for *Paenibacillus* given in the paper (in conjunction with the code supplied in Supplementary Methods 1). However, for the paper, we used data from 3 trials to calculate the statistics, so the results from analysis of a single trial may be slightly different.
