# Supplementary material for: Advection-dominated transport dynamics of pili and flagella-mediated motile bacteria in porous media
Source: Royal Society of Chemistry journal article supplement (doi:10.1039/d5sm00071h), 2025-01-01
Supplement: d5sm00071h19.pdf [file d5sm00071h19.pdf]

The following Matlab scripts (uploaded here as txt files) were used for statistical analysis:

bivariate\_heatmap.m  
EMSL\_flowD.m  
msd\_figures.m  
tmate\_vel\_angle\_calc.m  
vcorr\_plot.m

The following Python scripts (uploaded here as txt files) were used for statistical analysis:

tmate\_vel\_angle\_calc.py
